# Supplementary material for: Adaptation of an Evidence-Based Online Depression Prevention Intervention for College Students: Intervention Development and Pilot Study Results
Source: MDPI journal article supplement (doi:10.3390/socsci10100398), 2021-10-16
Supplement: s1 [file s1]

Table S1: Direct quotes from focus group participants relating to the themes that emerged from each research question

| Domain                                                                                                                          | Student Quotes                                                                                                                                                                                                                                                                                                                                                                                                                                                                                                                                                                                                                                                                                                |
|---------------------------------------------------------------------------------------------------------------------------------|---------------------------------------------------------------------------------------------------------------------------------------------------------------------------------------------------------------------------------------------------------------------------------------------------------------------------------------------------------------------------------------------------------------------------------------------------------------------------------------------------------------------------------------------------------------------------------------------------------------------------------------------------------------------------------------------------------------|
| Research Question #1: What issues, positive or negative, are central to the experience of college students at this institution? |                                                                                                                                                                                                                                                                                                                                                                                                                                                                                                                                                                                                                                                                                                               |
| Academic Pressure                                                                                                               | <p><i>"If everyone else feels stressed then you feel like you should be stressed too and you should be working harder and you should be doing work and it's just really hard to get people out of that mindset."</i></p> <p><i>"I feel like we put another load of stress on ourselves that is unnecessary because we keep comparing ourselves to other people. It's another level of pressure."</i></p>                                                                                                                                                                                                                                                                                                      |
| Financial Stress                                                                                                                | <p><i>"Being a low-income student, it's also very isolating when you're having to worry about money back home...And then also adding on top of that our academics and everything. For me there's not a lot of time to get involved in extracurriculars, so that can be isolating...because I'm having to be kind of preoccupied with the real world."</i></p> <p><i>"When you're making friends at the beginning of the year and making friend groups, there's this divide between who can afford to go out and do things and then not and then like what if someone gets mixed in with the crowd of people who can afford to do things and then gets excluded."</i></p>                                      |
| Access to Resources                                                                                                             | <p><i>"It's hard to know who to ask questions to like whether it's class questions or other questions or just like questions about where you get help for class or help with your mental health or about medical stuff or even tech help."</i></p> <p><i>"I think we have potential to support a lot of students and we have [only] just started to focus on groups that need that help like first gen students and underrepresented students across the board."</i></p>                                                                                                                                                                                                                                      |
| The Community                                                                                                                   | <p><i>about us as individual people. All institutions are flawed but I do feel like there are people looking out for you whether they are your peers, your deans, or your professors. I do feel like the community facilitates a level of consideration for the other people here."</i></p> <p><i>as really excited to be a part of and they're like social things [that I couldn't get into] and that really like is a blow to the confidence."</i></p>                                                                                                                                                                                                                                                      |
| Physical Environment                                                                                                            | <p><i>people are able to leave their dorm room unlocked or leave their backpack while they go get food without having to worry."</i></p> <p><i>room at 3:00 AM and I just walk around campus, I feel very safe."</i></p> <p><i>! people are actively looking at you very different and following you around the store constantly asking if you need help. I feel like it's not them being welcoming it's more like to make sure that, 'she has a backpack, make sure that she doesn't take anything.'</i></p>                                                                                                                                                                                                 |
| Research Question #2: What content should the intervention cover, and how should the intervention be delivered?                 |                                                                                                                                                                                                                                                                                                                                                                                                                                                                                                                                                                                                                                                                                                               |
| Content to Include                                                                                                              | <p><i>"I think for people who are experiencing mental health problems for the first time, if it's a new experience you wouldn't be able to recognize the signs, [you] might think this is normal, this is stress. Because personally I never thought I would be struggling with things but then you just do and its weird and you don't realize you are [struggling]."</i></p> <p><i>"It took me three years to ask for an extension and I totally could have...when I finally asked, he was like, 'no problem' and he gave me almost a week to do it. It's not that hard but if no one has specifically told you, 'you can do this, it's okay [to ask], and this is how' it's hard [to figure out]."</i></p> |

Research Question #3: How can the intervention best reflect and address the diversity of the student population?

---

Diverse Personal  
Experiences

*"Students who have to deal with [mental or physical illness] often have to schedule things around that which can be a burden...like how to manage unexpected disruptions as a result of the illness.*

*"Someone who is having troubles at home and having to have one foot back at ... like a sickness at home or some kind of other hardship."*
